# Supplementary material
Source: MDPI journal article supplement (https://www.mdpi.com/1996-1073/17/1/133)
Supplement: s1 [file s1]

## Supplementary Materials

**Table S1.** Properties of the feedstocks.

| Properties                        | Oat straw | Sawdust | Source     |
|-----------------------------------|-----------|---------|------------|
| Bulk density (kg/m <sup>3</sup> ) | 127.87    | 158.00  | [29,31]    |
| HHV (MJ/kg)                       | 16.84     | 18.02   | [29,31,32] |
| Cellulose (%)                     | 47.45     | 41.24   | [29,31]    |
| Hemicellulose (%)                 | 24.70     | 15.72   | [29,31,32] |
| Lignin (%)                        | 12.92     | 25.16   | [29,31]    |
| Ash (%)                           | 5.32      | 0.54    | [29,31]    |
| Other solids (%)                  | 9.61      | 7.34    | [29,31]    |
| Moisture content (%)              | 10        | 10      | [29,31]    |

HHV: Higher heating value

**Table S2.** Cost assumptions and economic evaluation parameters.

| Parameters                           | Value                  | Source                     |
|--------------------------------------|------------------------|----------------------------|
| Time parameters                      |                        |                            |
| Year of analysis                     | 2023                   |                            |
| Currency                             | US Dollars (\$)        |                            |
| Construction period                  | 12 months              |                            |
| Startup period                       | 6 months               |                            |
| Project lifetime                     | 20 years               |                            |
| Inflation                            | 2%                     |                            |
| Financial parameters                 |                        |                            |
| Depreciation style                   | Straight line          |                            |
| Depreciation time                    | 10 years               |                            |
| Revenue tax rate                     | 40%                    |                            |
| Salvage value                        | 5% of DFC              |                            |
| Discount rate                        | 10%                    |                            |
| Operating cost                       |                        |                            |
| Operation capacity                   | 90%                    |                            |
| Labor                                | \$ 69/h                | SuperPro designer databank |
| Sawdust                              | \$ 75/t                | Antonio et al. [37]        |
| Oat straw                            | \$ 70/t                | BIMAT [33]                 |
| Nitrogen gas                         | 0.11 / Nm <sup>3</sup> | EIA [6]                    |
| Selling price of pellet              | \$60/t - \$260/t       | [18,26,51]                 |
| Selling price of torrefaction liquid | \$0.25/L               | Badger et al. [27]         |
| Utilities                            |                        |                            |
| Steam (High P)                       | \$ 20/t                | SuperPro designer databank |
| Steam                                | \$ 12/t                | SuperPro designer databank |
| Cooling water                        | \$ 0.05/t              | SuperPro designer databank |
| Electricity                          | \$ 0.1/kW-h            | SuperPro designer databank |

DFC: Direct fixed capital cost.

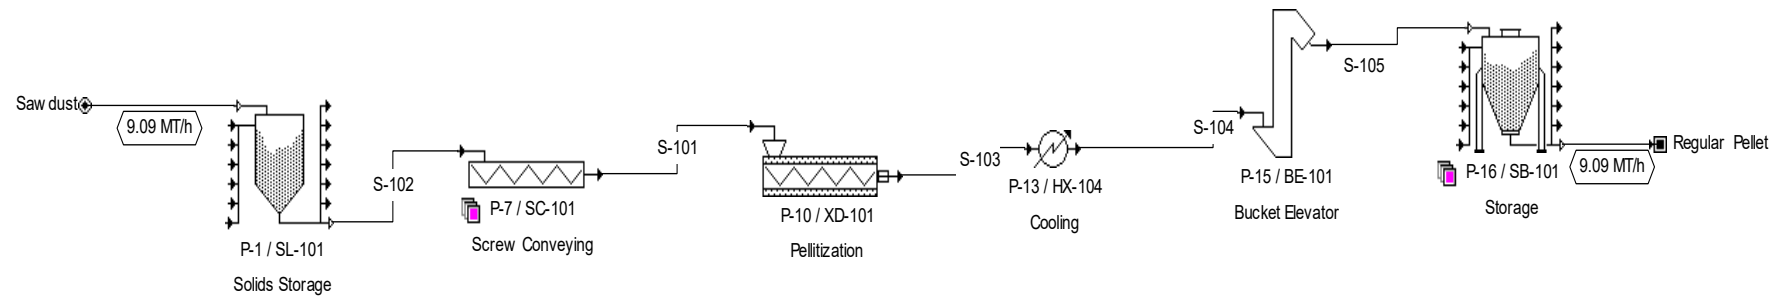

**Figure S1.** The process of pelleting raw sawdust (Scenario 1).

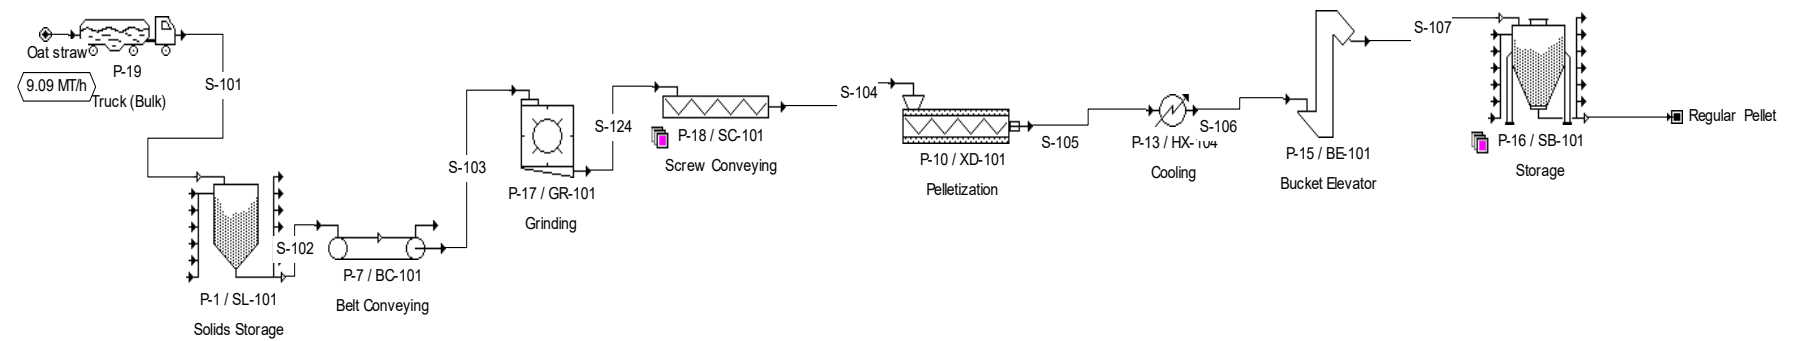

**Figure S2.** The process of pelleting raw oat straw (Scenario 2).

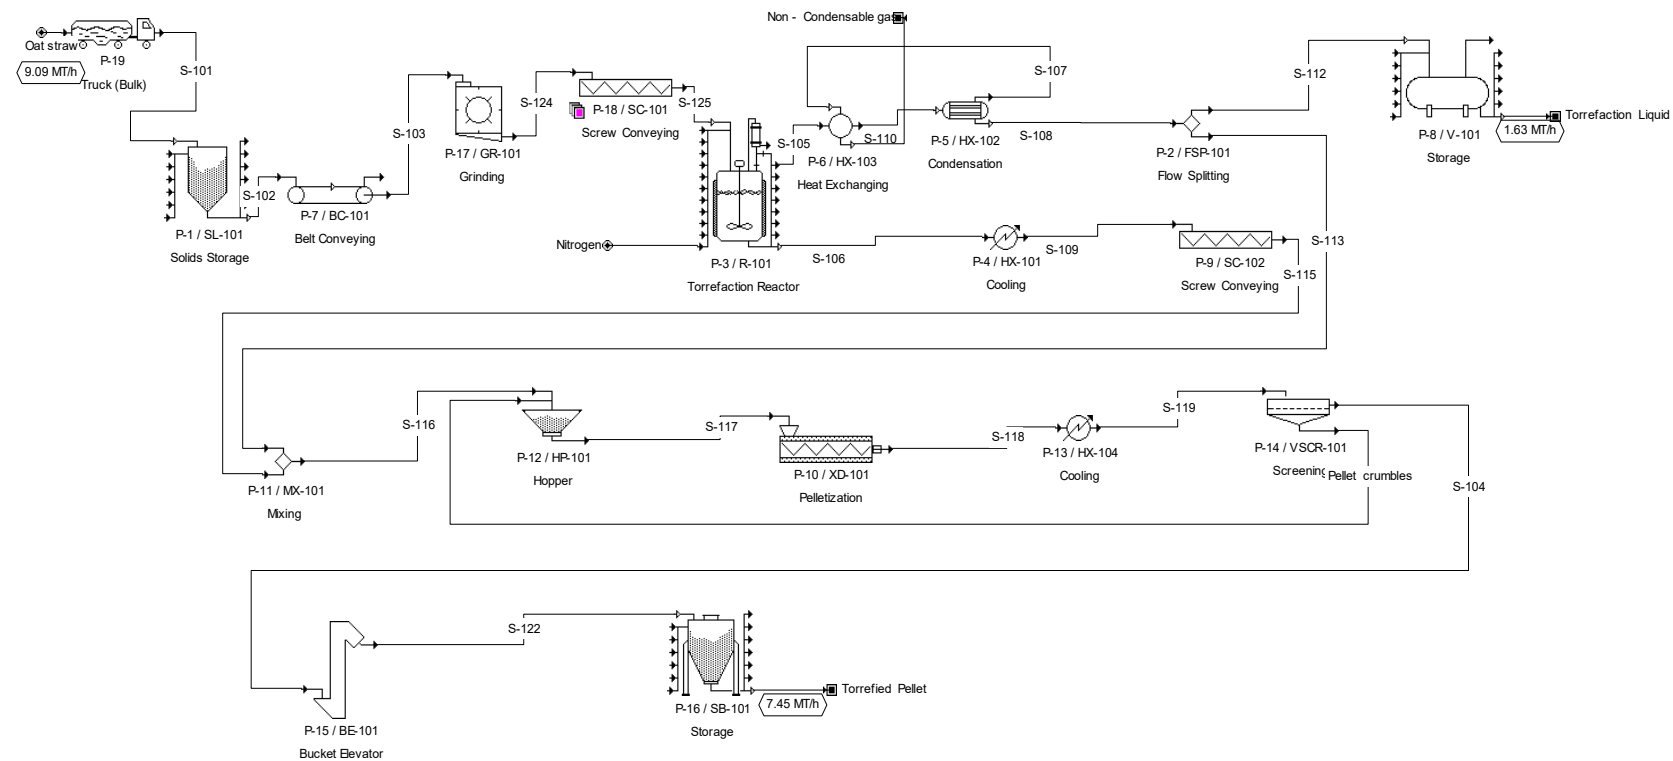

**Figure S3.** Integrated torrefied treated oat straw pelletization plant utilizing torrefaction liquid (TL) as binder (Scenario 4).

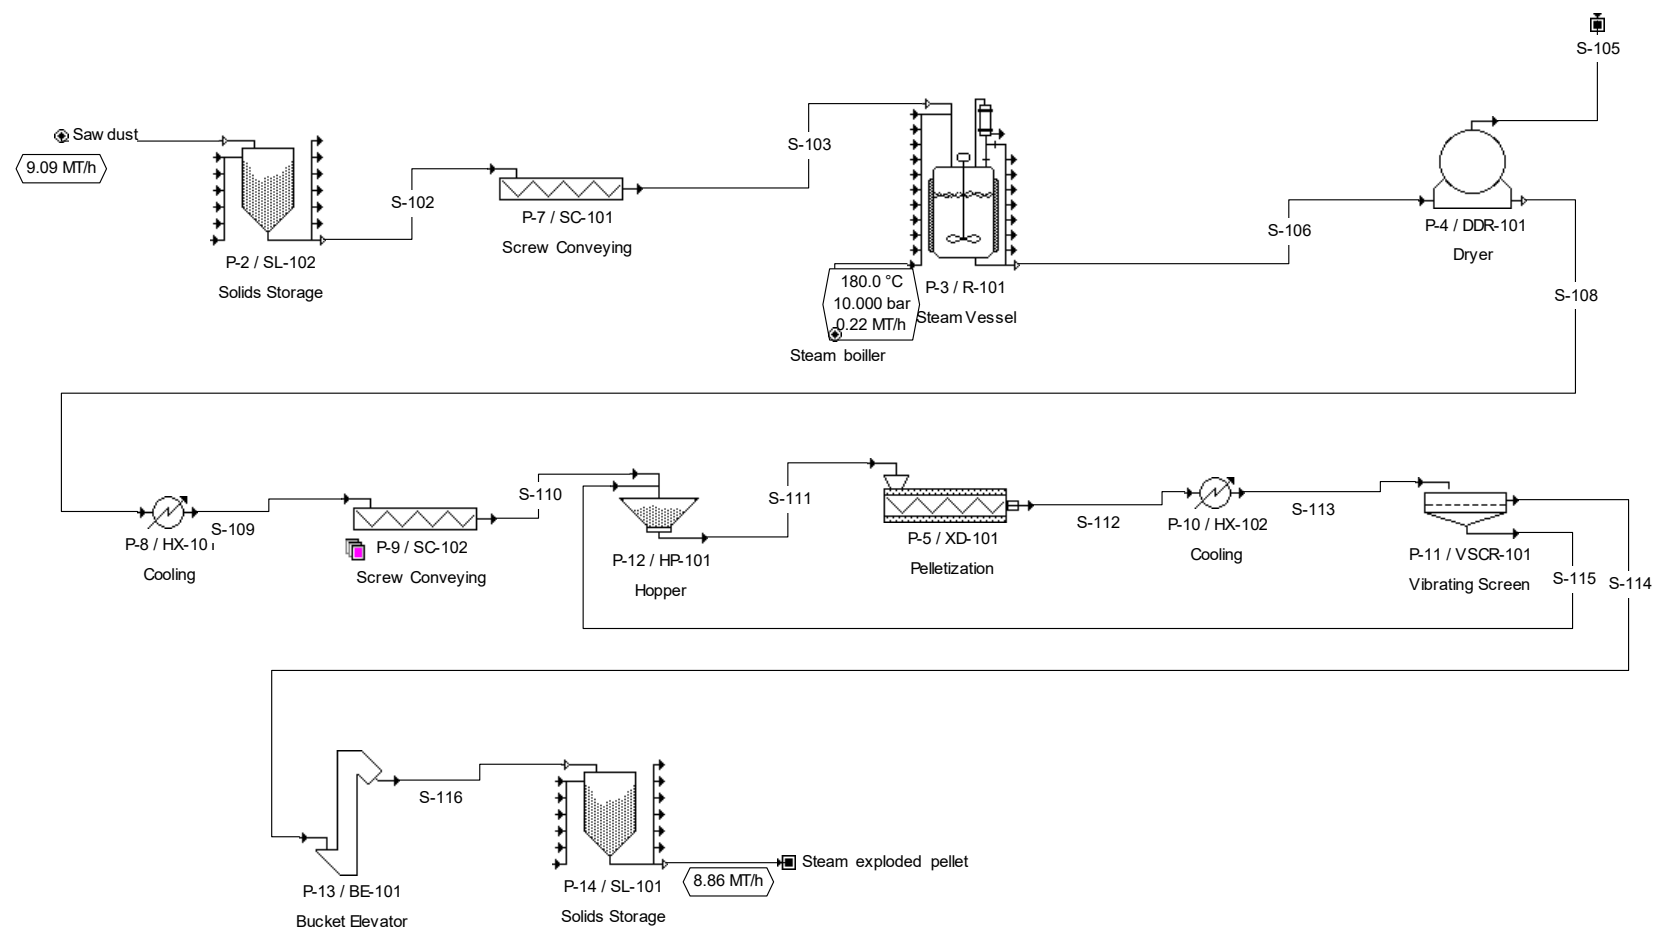

**Figure S4.** Integrated steam exploded treated sawdust pellet plant (Scenario 5).

**Table S3.** Major equipment costs (2023 prices in US\$) for Scenarios 1 and 2.

| Description        | Cost (\$) (number of units in parentheses) |                  |
|--------------------|--------------------------------------------|------------------|
|                    | Scenario 1                                 | Scenario 2       |
| Silo/bin           | 477,000 (4)                                | 247,000 (2)      |
| Grinder            |                                            | 154,000 (1)      |
| Screw conveyor     | 176,000 (2)                                | 162,000 (2)      |
| Belt conveyor      |                                            | 177,000 (1)      |
| Pelletizer         | 212,000 (1)                                | 212,000 (1)      |
| Heat exchanger     | 23,000 (1)                                 | 23,000 (1)       |
| Bucket elevator    | 20,000 (1)                                 | 20,000 (1)       |
| Unlisted equipment | 230,000                                    | 265,000          |
| <b>Total</b>       | <b>1,148,000</b>                           | <b>1,323,000</b> |

**Table S4.** Major equipment costs (2023 prices in US\$) for Scenarios 3 and 4.

| Description          | Cost (\$) (number of units in parentheses) |                  |
|----------------------|--------------------------------------------|------------------|
|                      | Scenario 3                                 | Scenario 4       |
| Silo/bin             | 477,000 (4)                                | 338,000 (3)      |
| Grinder              |                                            | 301,000 (2)      |
| Screw conveyor       | 374,000 (4)                                | 254,000 (3)      |
| Torrefaction reactor | 3,875.000 (1)                              | 3,875.000 (1)    |
| Condenser            | 34,000 (1)                                 | 34,000 (1)       |
| Flow splitter        | 163,000 (1)                                | 163,000 (1)      |
| Horizontal tank      | 48,000 (2)                                 | 24,000 (1)       |
| Belt conveyor        |                                            | 789,000 (3)      |
| Pelletizer           | 185,000 (1)                                | 212,000 (1)      |
| Vibrating screen     | 33,000 (1)                                 | 38,000 (1)       |
| Heat exchanger       | 420,000 (8)                                | 236,000 (4)      |
| Bucket elevator      | 20,000 (1)                                 | 23,000 (1)       |
| Unlisted equipment   | 1,410,000                                  | 1,572,000        |
| <b>Total</b>         | <b>7,048,000</b>                           | <b>7,859,000</b> |

**Table S5.** Major equipment costs (2023 prices in US\$) for Scenarios 5 and 6.

| Description        | Cost (\$) (number of units in parentheses) |                  |
|--------------------|--------------------------------------------|------------------|
|                    | Scenario 5                                 | Scenario 6       |
| Steam generator    | 638,000 (1)                                | 641,000 (1)      |
| Dryer              | 131,000 (1)                                | 264,000 (2)      |
| Silo/bin           | 140,000 (2)                                | 70,000 (1)       |
| Grinder            |                                            | 109,000 (1)      |
| Screw conveyor     | 272,000 (3)                                | 275,000 (3)      |
| Belt conveyor      |                                            | 263,000 (3)      |
| Pelletizer         | 273,000 (1)                                | 273,000 (1)      |
| Vibrating screen   | 13,000 (1)                                 | 12,000 (1)       |
| Heat exchanger     | 210,000 (4)                                | 363,000 (6)      |
| Bucket elevator    | 23,000 (1)                                 | 23,000 (1)       |
| Unlisted equipment | 425,000                                    | 535,000          |
| <b>Total</b>       | <b>2,125,000</b>                           | <b>2,675,000</b> |
